# Supplementary material for: Genome-wide identification of Hsp70/110 genes in rainbow trout and their regulated expression in response to heat stress
Source: PeerJ. 2020 Oct 23;8:e10022. doi: 10.7717/peerj.10022 (PMC7587057; doi:10.7717/peerj.10022)
Supplement: Supplemental Information 6 [file peerj-08-10022-s006.xlsx]

## Sheet: Liver
Liver
hsp70		CT	B-actian	△ct	△△ct	2△△ct
	18-1	17.4	13.85	3.55	0	1
	18-2	16.87	13.46	3.41	-0.14	1.10191
	18-3	16.54	13.05	3.49	-0.06	1.04247
	24-1	17.15	14.65	2.5	-1.05	2.07053
	24-2	16.58	14.23	2.35	-1.2	2.2974
	24-3	17.12	14.52	2.6	-0.95	1.93187
hspa5		CT	B-actian	△ct	△△ct	2△△ct
	18-1	16.2	13.42	2.78	0	1
	18-2	17.08	14.4	2.68	-0.1	1.07177
	18-3	16.89	14.08	2.81	0.03	0.97942
	24-1	17.17	15.57	1.6	-1.18	2.26577
	24-2	14.72	12.89	1.83	-0.95	1.93187
	24-3	15.57	14.15	1.42	-1.36	2.56685
hspa4L		CT	B-actian	△ct	△△ct	2△△ct
	18-1	16.98	14.38	2.6	0	1
	18-2	17.77	15.12	2.65	0.05	0.965936
	18-3	17.25	14.68	2.57	-0.03	1.02101
	24-1	18.12	17.24	0.88	-1.72	3.29436
	24-2	18.35	17.58	0.77	-1.83	3.55537
	24-3	18.27	17.12	1.15	-1.45	2.73208
hspa8a		CT	B-actian	△ct	△△ct	2△△ct
	18-1	17.46	13.85	3.61	0	1
	18-2	17.05	13.54	3.51	-0.1	1.07177
	18-3	17.24	13.15	4.09	0.48	0.716978
	24-1	16.36	14.72	1.64	-1.97	3.91768
	24-2	15.86	14.28	1.58	-2.03	4.08405
	24-3	16.25	14.68	1.57	-2.04	4.11246

## Sheet: head kidney
head kidney
hspa4		CT	B-actian	△ct	△△ct	2△△ct
	18-1	16.31	13.88	2.43	0	1
	18-2	17.01	14.55	2.46	0.03	0.97942
	18-3	16.57	14.26	2.31	-0.12	1.08673
	24-1	17.63	15.68	1.95	-0.48	1.39474
	24-2	17.76	15.89	1.87	-0.56	1.47427
	24-3	16.98	15.25	1.73	-0.7	1.6245
hspa5		CT	B-actian	△ct	△△ct	2△△ct
	18-1	16.39	14.5	1.89	0	1
	18-2	17.1	14.98	2.12	0.23	0.852635
	18-3	16.87	15.12	1.75	-0.14	1.10191
	24-1	17.51	16.37	1.14	-0.75	1.68179
	24-2	18.47	17.6	0.87	-1.02	2.02792
	24-3	17.92	17.05	0.87	-1.02	2.02792
hspa4L		CT	B-actian	△ct	△△ct	2△△ct
	18-1	25.25	13.85	11.4	0	1
	18-2	25.77	13.54	12.23	0.83	0.562529
	18-3	24.89	13.97	10.92	-0.48	1.39474
	24-1	26.49	16.72	9.77	-1.63	3.09513
	24-2	26.84	17.28	9.56	-1.84	3.5801
	24-3	27.24	17.66	9.58	-1.82	3.53081
hspa8b		CT	B-actian	△ct	△△ct	2△△ct
	18-1	23.73	13.88	9.85	0	1
	18-2	24.74	14.69	10.05	0.2	0.870551
	18-3	23.65	13.84	9.81	-0.04	1.02811
	24-1	26.9	17.68	9.22	-0.63	1.54756
	24-2	25.87	16.89	8.98	-0.87	1.82766
	24-3	26.02	17.34	8.68	-1.17	2.25012
hspa8a		CT	B-actian	△ct	△△ct	2△△ct
	18-1	23.92	14.5	9.42	0	1
	18-2	24.03	14.98	9.05	-0.37	1.29235
	18-3	23.28	13.51	9.77	0.35	0.784584
	24-1	25.62	17.13	8.49	-0.93	1.90528
	24-2	25.93	17.6	8.33	-1.09	2.12874
	24-3	25.46	16.78	8.68	-0.74	1.67018
hsp70a		CT	B-actian	△ct	△△ct	2△△ct
	18-1	22.63	17.71	4.92	0	1
	18-2	22.38	17.21	5.17	0.25	0.840896
	18-3	22.73	18.08	4.65	-0.27	1.20581
	24-1	22.95	19.32	3.63	-1.29	2.44528
	24-2	23.61	19.58	4.03	-0.89	1.85318
	24-3	23.05	19.41	3.64	-1.28	2.42839
hspa9		CT	B-actian	△ct	△△ct	2△△ct
	18-1	17.4	16.88	0.52	0	1
	18-2	18.05	17.25	0.8	0.28	0.823591
	18-3	18.03	17.15	0.88	0.36	0.779165
	24-1	15.93	17.15	-1.22	-1.74	3.34035
	24-2	16.6	17.51	-0.91	-1.43	2.69447
	24-3	16.73	16.04	0.69	0.17	0.888843
